# Supplementary material for: Design, synthesis and photophysical aspects of 1,2,3-triazole appended Schiff base functionalized silanes and silatranes
Source: Royal Society of Chemistry journal article supplement (doi:10.1039/d1nj03364f), 2021-01-01
Supplement: d1nj03364f1.pdf [file d1nj03364f1.pdf]

## **Design, synthesis and photophysical aspects of 1,2,3-triazole appended schiff base functionalized silanes and silatranes**

Gurjaspreet Singh<sup>a\*</sup>, Priyanka<sup>a</sup>, Sushma<sup>a</sup>, Diksha<sup>a</sup>, Mohit<sup>a</sup>, Suman<sup>a</sup>, Jashan Deep Kaur<sup>a</sup>,  
Anamika Saini<sup>a</sup>, Pinky Satija<sup>b</sup>,

<sup>a</sup>Department of Chemistry, Panjab University, Chandigarh-160014, India

<sup>b</sup>School of Advanced Chemical Sciences, Shoolini University, Solan, Himachal Pradesh-173212,  
India

\*Corresponding Author

1. Prof. Gurjaspreet Singh

Department of Chemistry,

Panjab University,

Chandigarh, India-160014

Email: [gjsingh@pu.ac.in](mailto:gjsingh@pu.ac.in)

| <b>Entry</b>                                                 | <b>Page No.</b> |
|--------------------------------------------------------------|-----------------|
| <sup>1</sup> H NMR spectrum of compound 5a (Fig.S1)          | 3               |
| <sup>1</sup> H NMR spectrum of compound 5b (Fig.S2)          | 3               |
| <sup>1</sup> H NMR spectrum of compound 5c(Fig.S3)           | 4               |
| <sup>1</sup> H NMR spectrum of compound 5d (Fig.S4)          | 4               |
| <sup>1</sup> H NMR spectrum of compound 6a (Fig.S5)          | 5               |
| <sup>1</sup> H NMR spectrum of compound 6b (Fig.S6)          | 5               |
| <sup>1</sup> H NMR spectrum of compound 6c(Fig.S7)           | 6               |
| <sup>1</sup> H NMR spectrum of compound 6d (Fig.S8)          | 6               |
| <sup>13</sup> C NMR spectrum of compound 6a (Fig.S9)         | 7               |
| <sup>13</sup> C NMR spectrum of compound 6b (Fig.S10)        | 7               |
| <sup>13</sup> C NMR spectrum of compound 6c (Fig.S11)        | 8               |
| <sup>13</sup> C NMR spectrum of compound 6d (Fig.S12)        | 8               |
| Mass spectrum of compound 5a (Fig.S13)                       | 9               |
| Mass spectrum of compound 5b (Fig.S14)                       | 9               |
| Mass spectrum of compound 5c (Fig.S15)                       | 10              |
| Mass spectrum of compound 5d (Fig.S16)                       | 10              |
| Mass spectrum of compound 6a (Fig.S17)                       | 11              |
| Mass spectrum of compound 6b (Fig.S18)                       | 11              |
| Mass spectrum of compound 6c (Fig.S19)                       | 12              |
| Mass spectrum of compound 6d (Fig.S20)                       | 12              |
| <sup>1</sup> H NMR spectrum of metal-complex of 5a (Fig.S21) | 13              |
| <sup>1</sup> H NMR spectrum of metal-complex of 6a (Fig.S22) | 13              |

5a

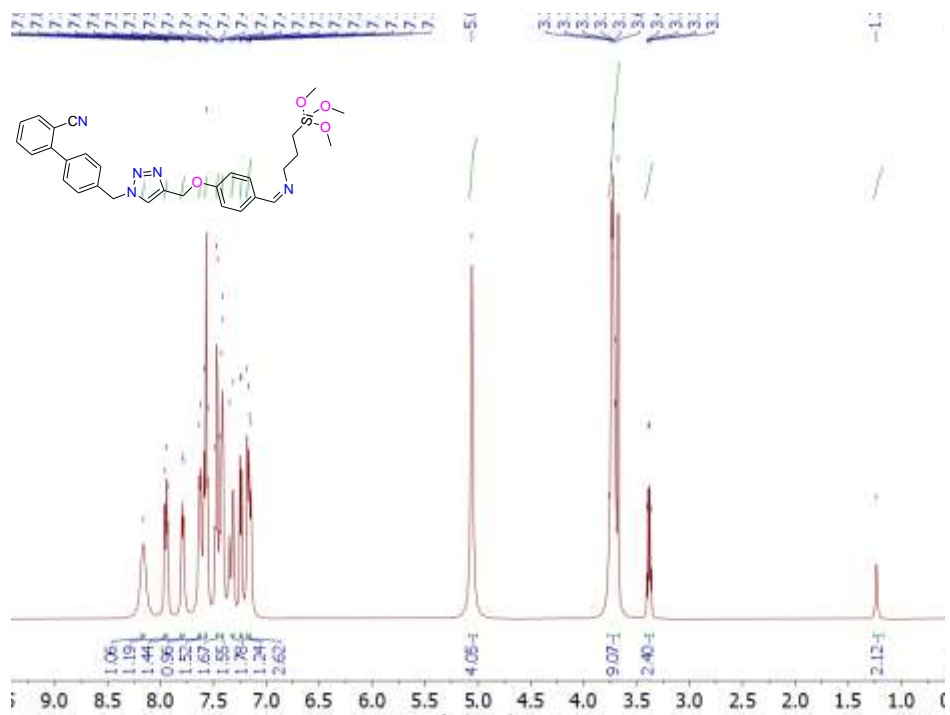

<sup>1</sup>H NMR spectrum of compound 5a (Fig.S1)

5b

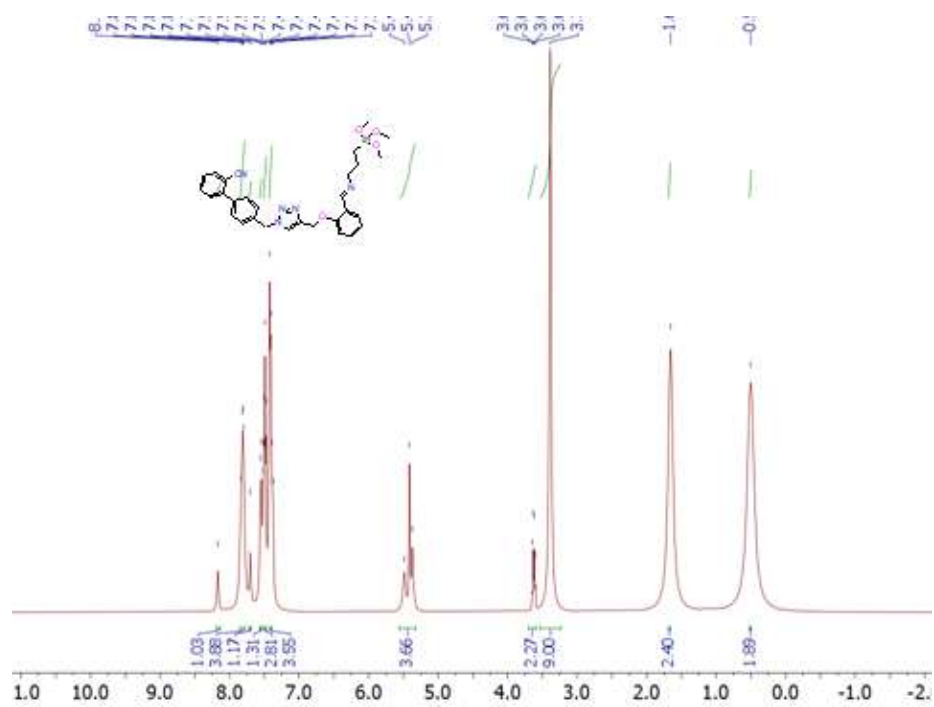

<sup>1</sup>H NMR spectrum of compound 5b (Fig.S2)

5c

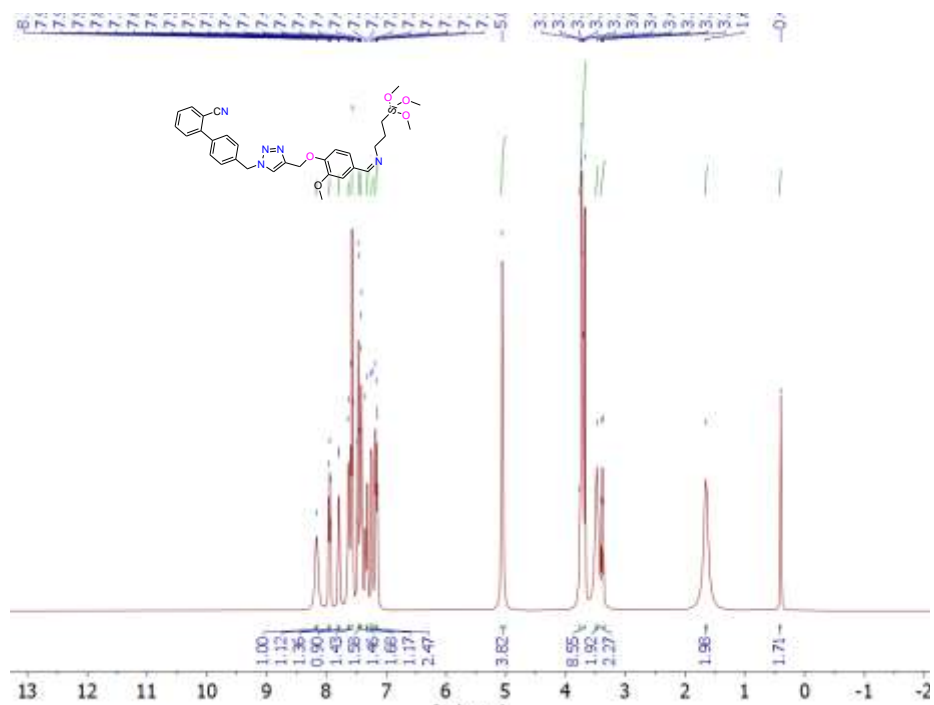

<sup>1</sup>H NMR spectrum of compound 5c (Fig.S3)

5d

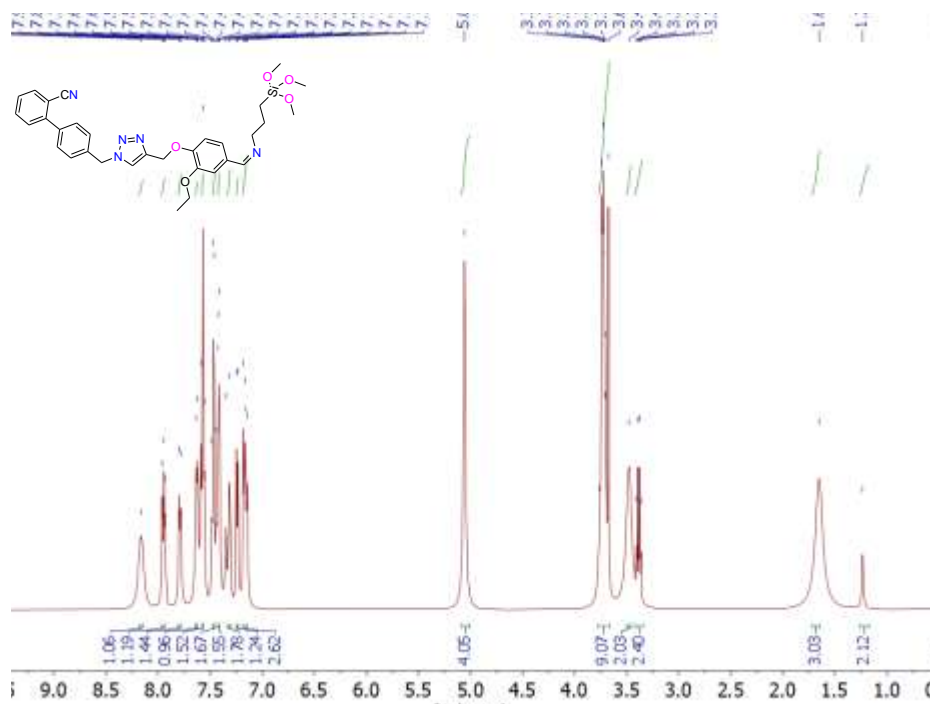

<sup>1</sup>H NMR spectrum of compound 5d (Fig.S4)

6a

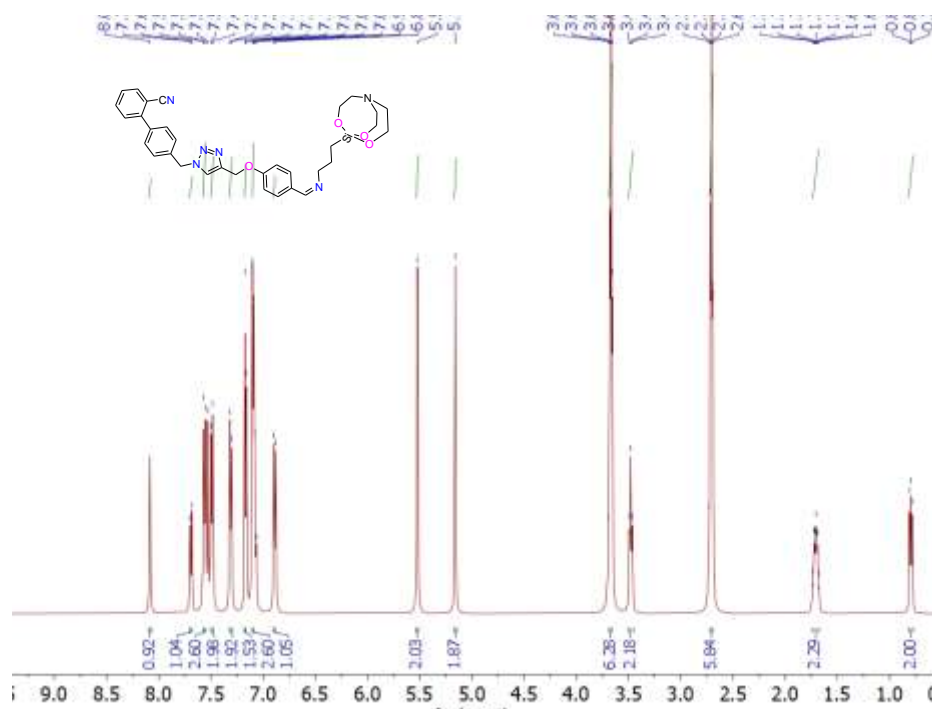

<sup>1</sup>H NMR spectrum of compound 6a (Fig.S5)

6b

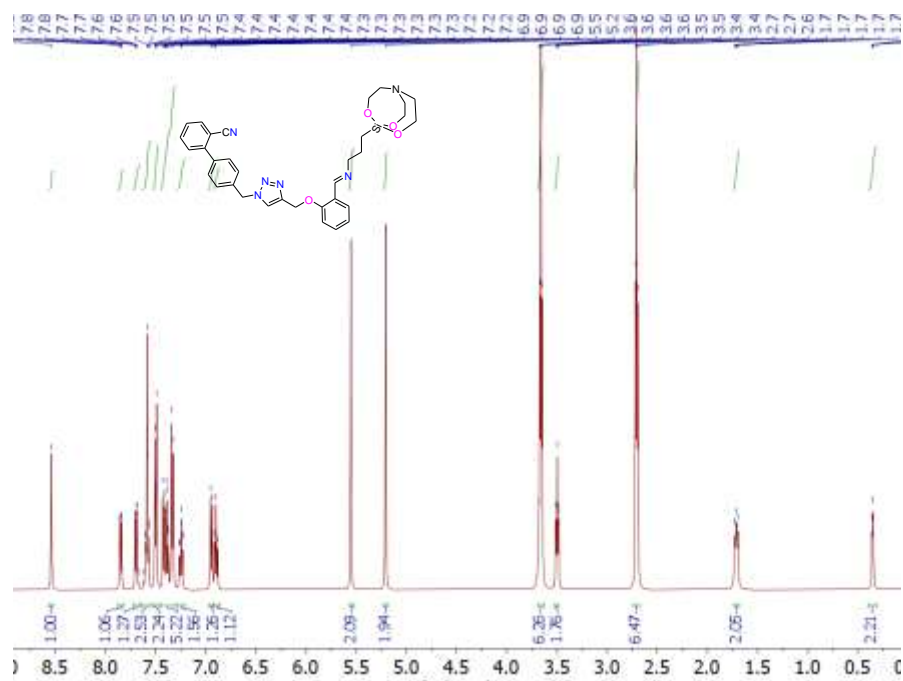

<sup>1</sup>H NMR spectrum of compound 6b (Fig.S6)

6c

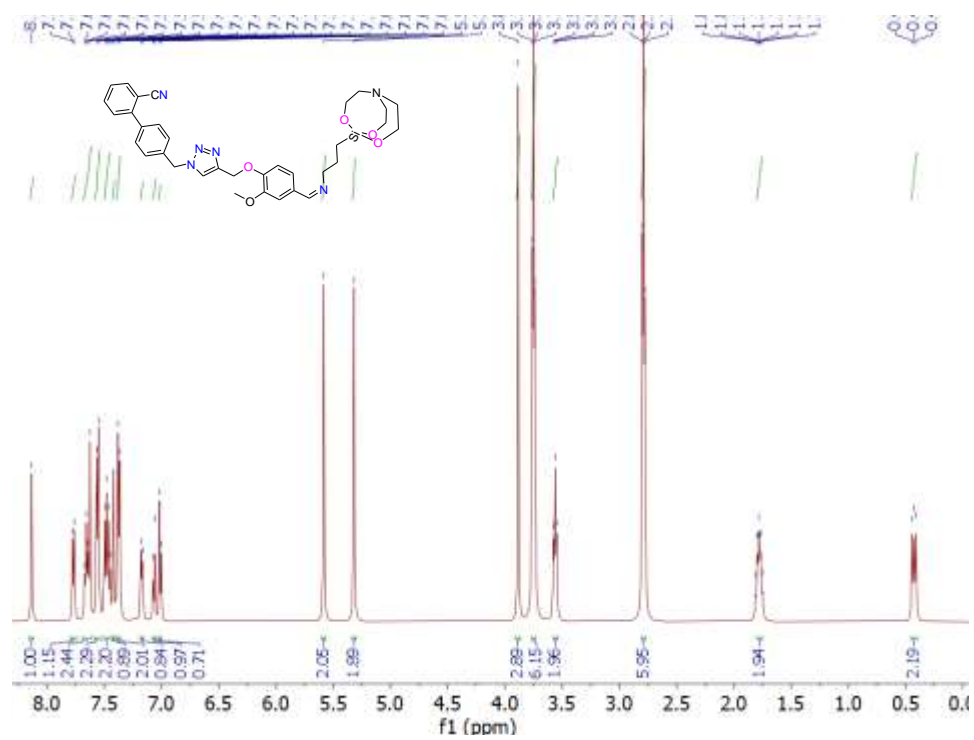

<sup>1</sup>H NMR spectrum of compound 6c (Fig.S7)

6d

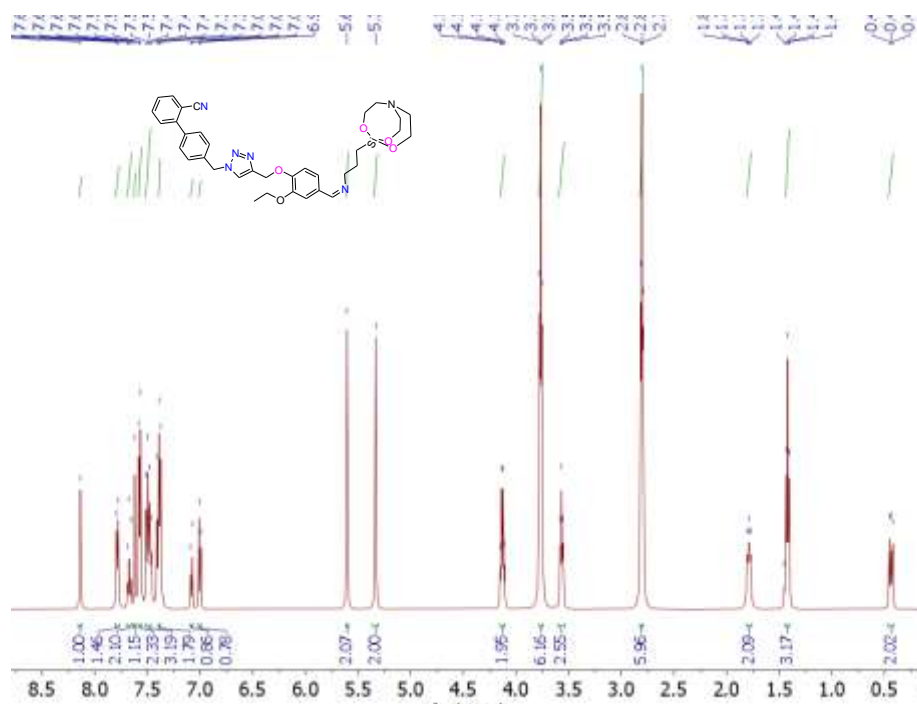

<sup>1</sup>H NMR spectrum of compound 6d (Fig.S8)

6a

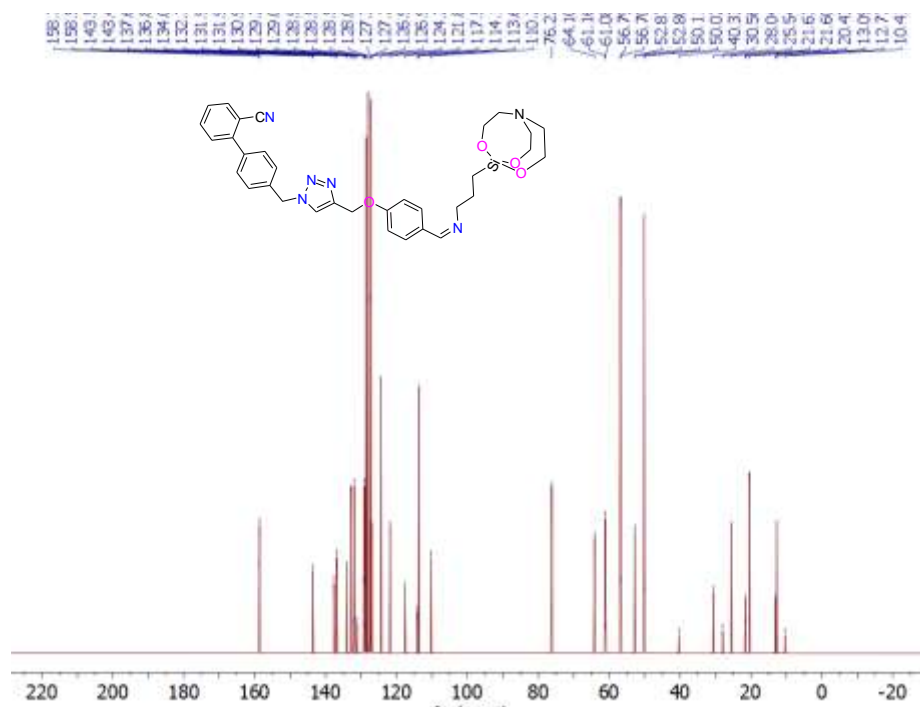

<sup>13</sup>C NMR spectrum of compound 6a (Fig.S9)

6b

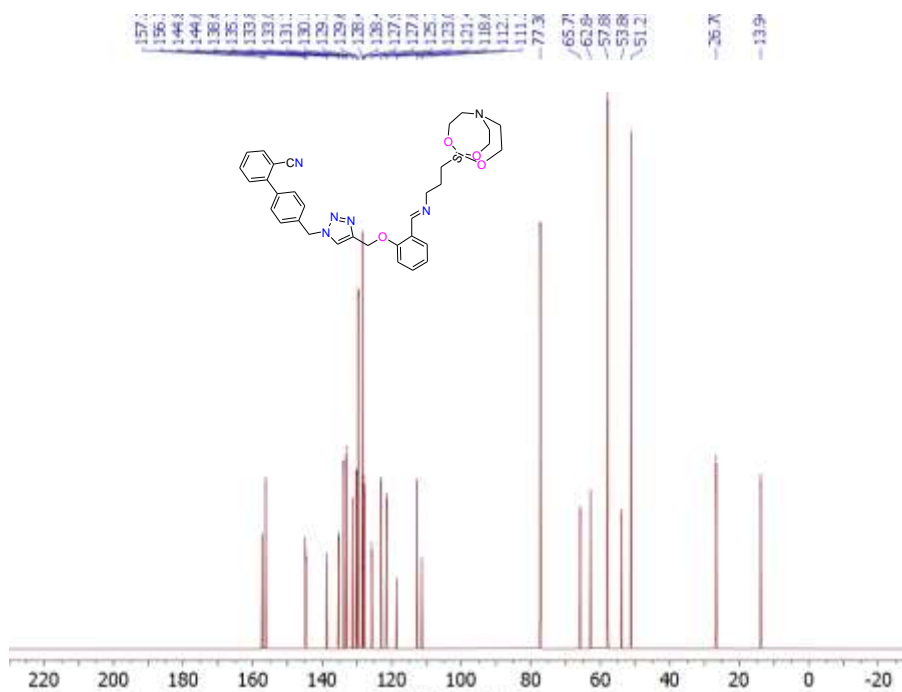

<sup>13</sup>C NMR spectrum of compound 6b (Fig.S10)

6c

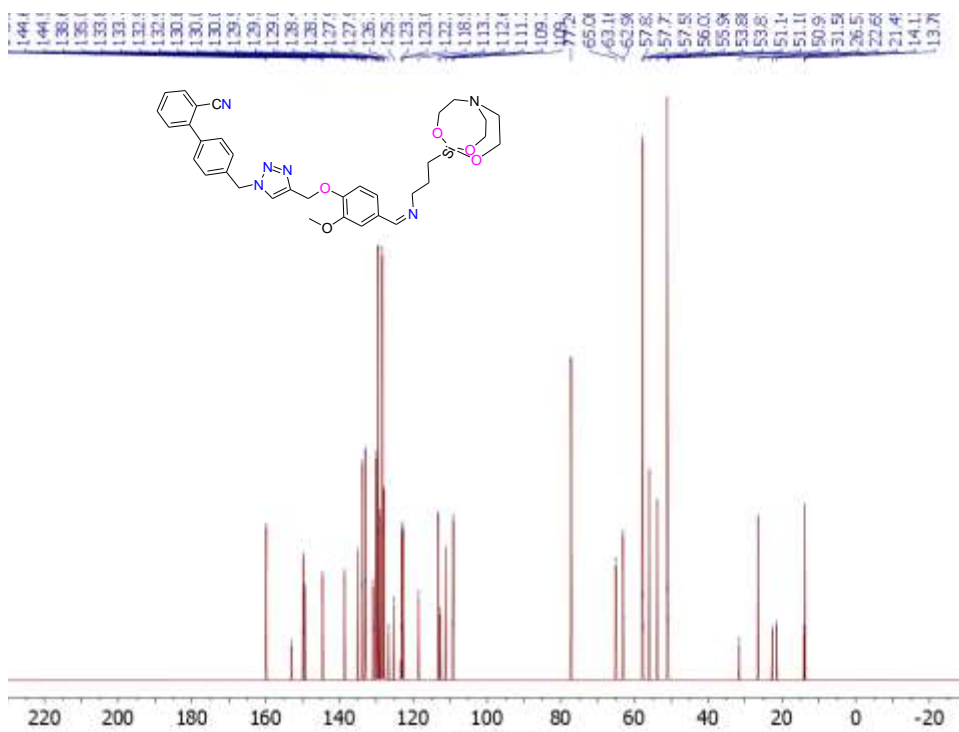

<sup>13</sup>C NMR spectrum of compound 6c (Fig.S11)

6d

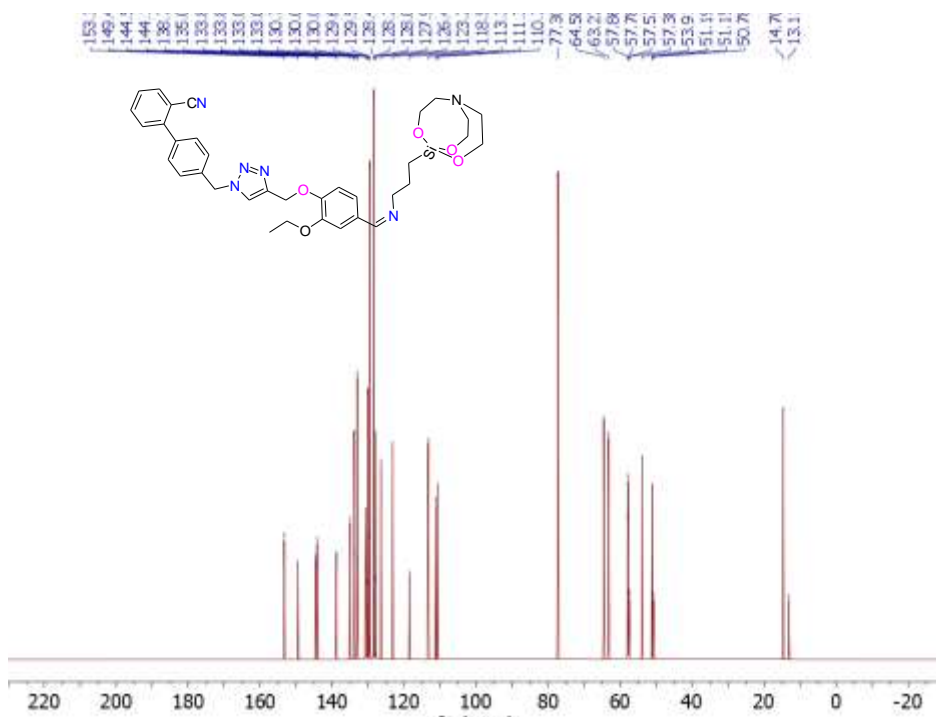

<sup>13</sup>C NMR spectrum of compound 6d (Fig.S12)



5a

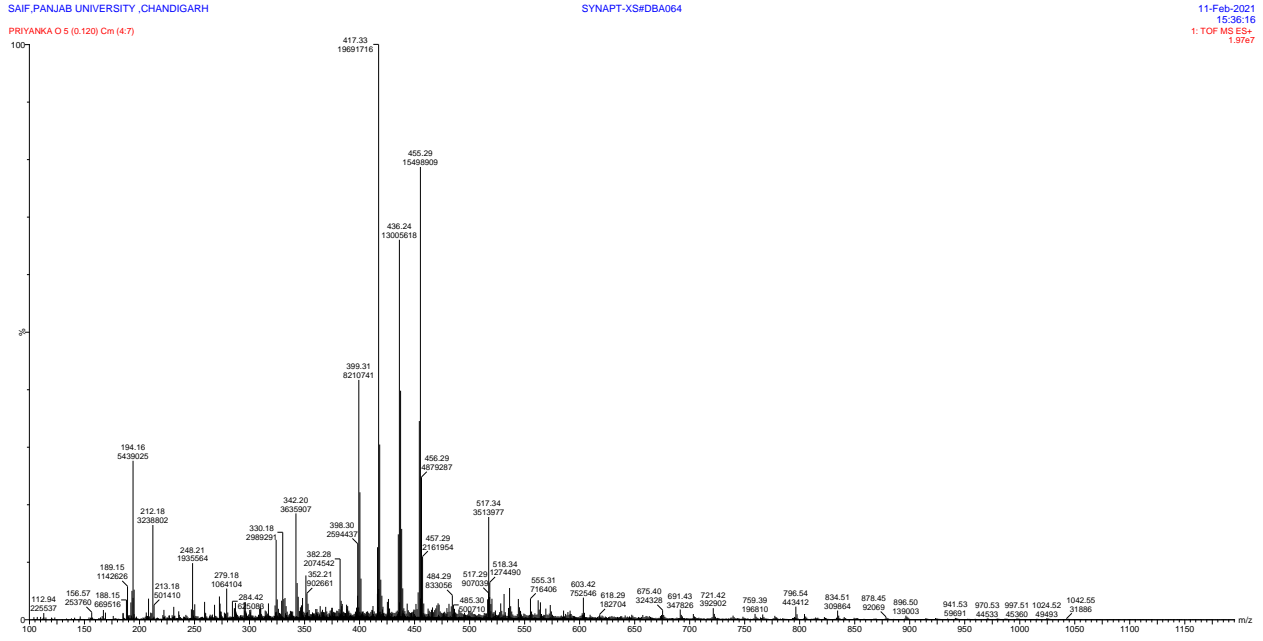

5b

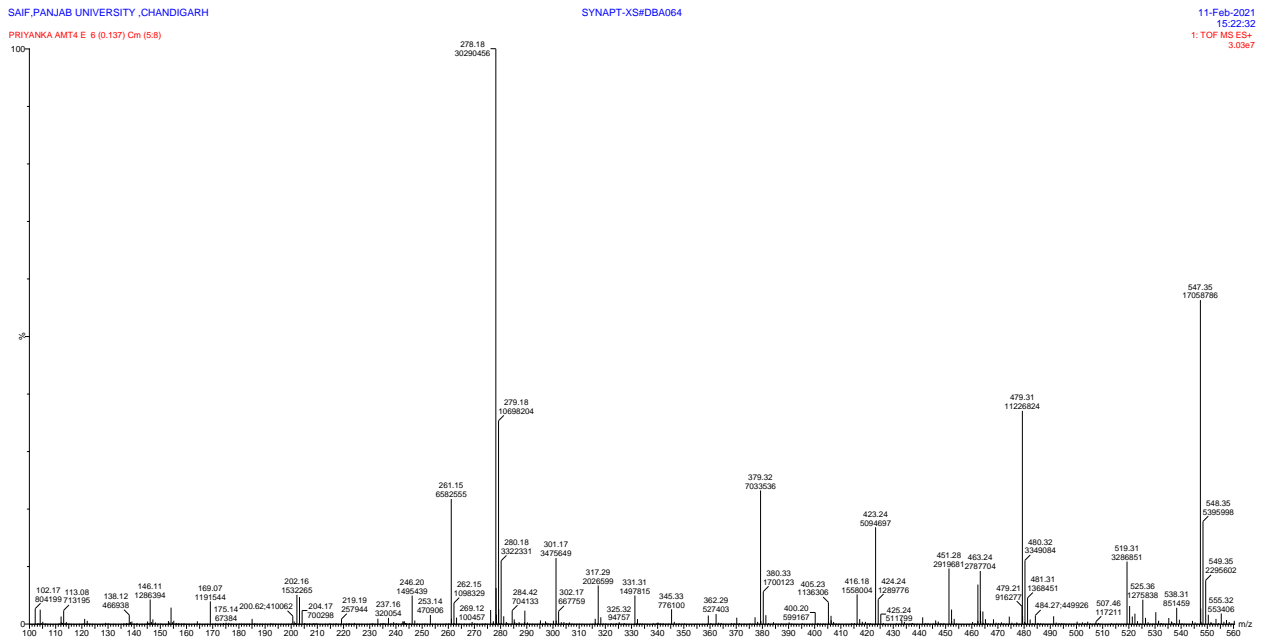

5c

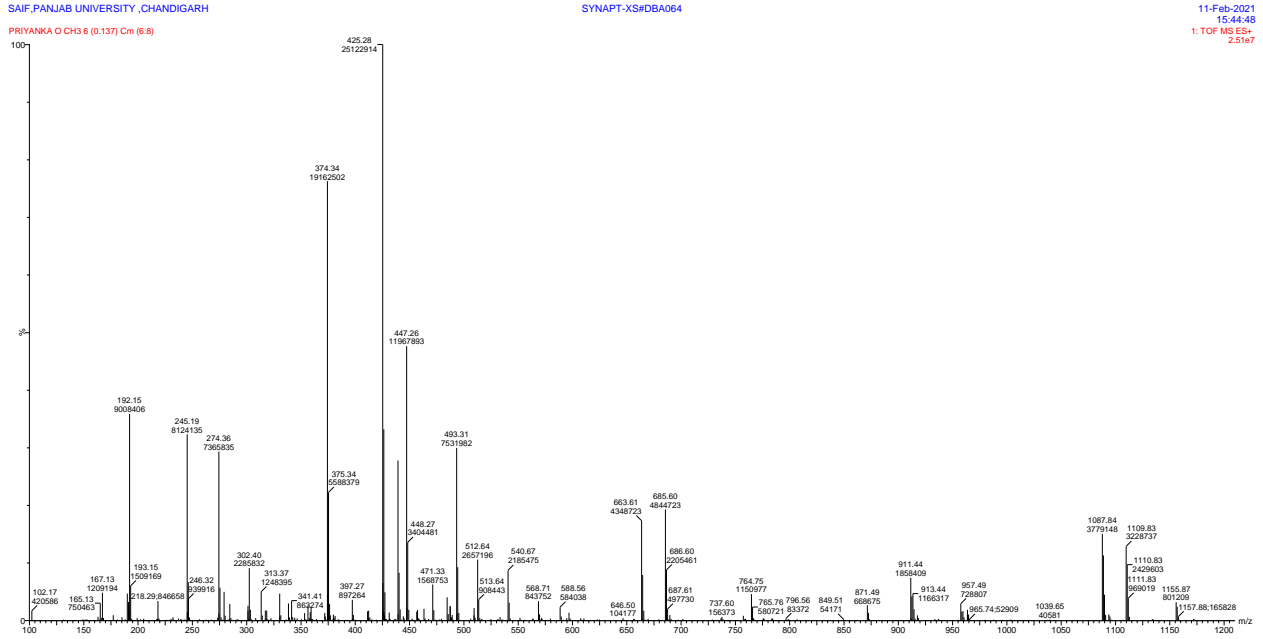

5d

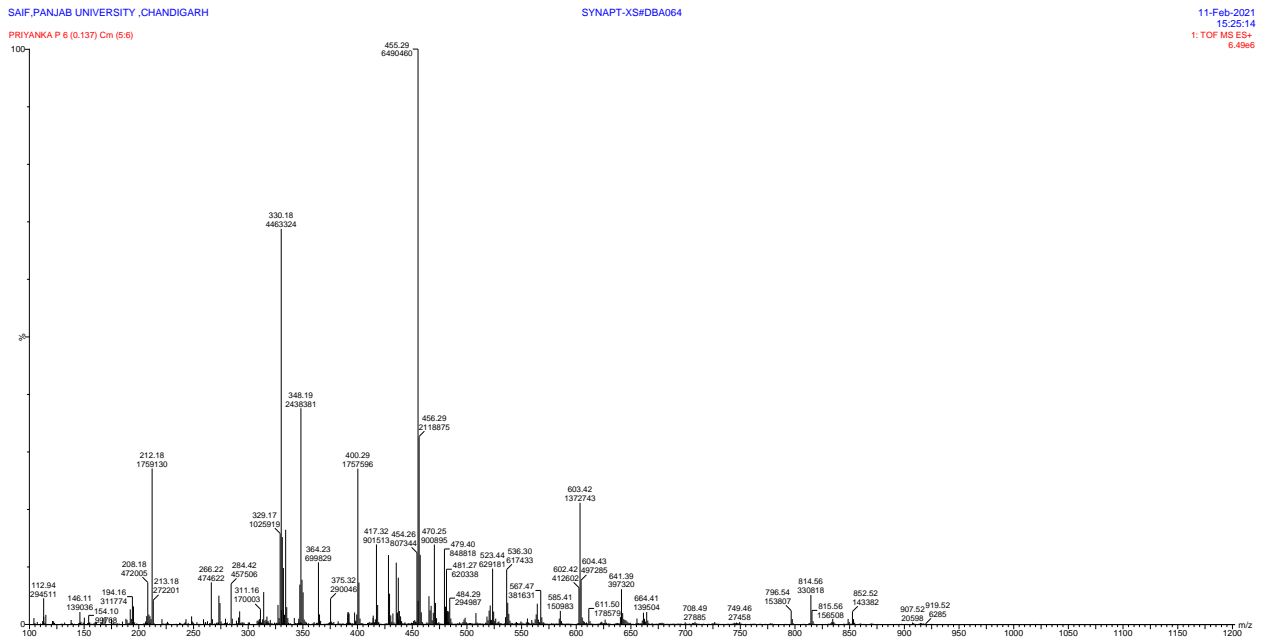

6a

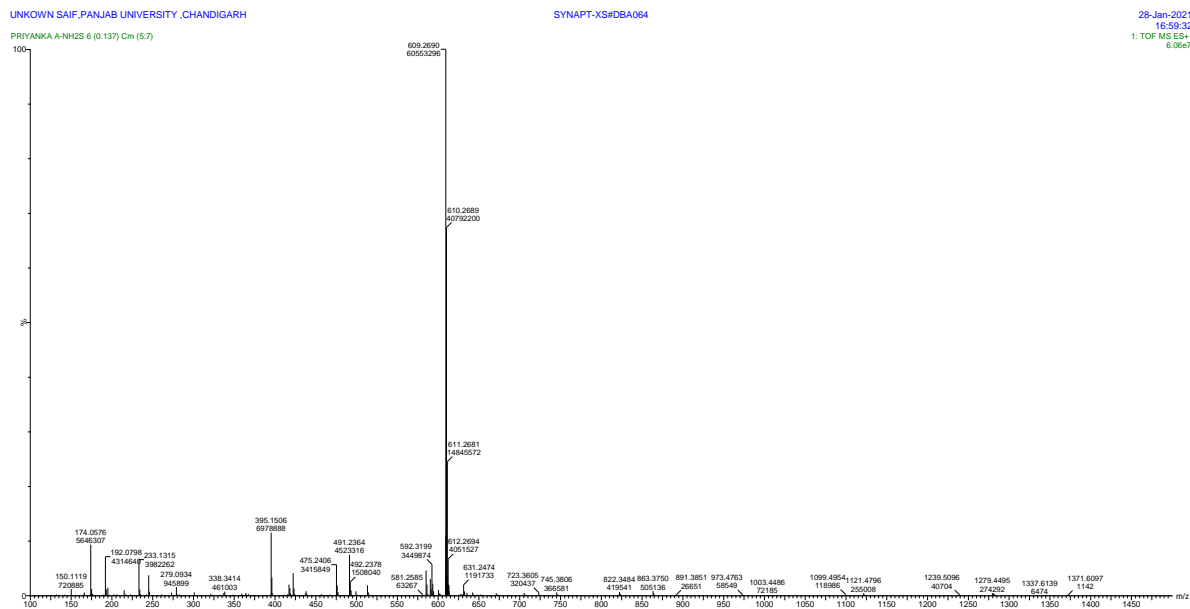

Mass spectrum of compound 6a (Fig.S17)

6b

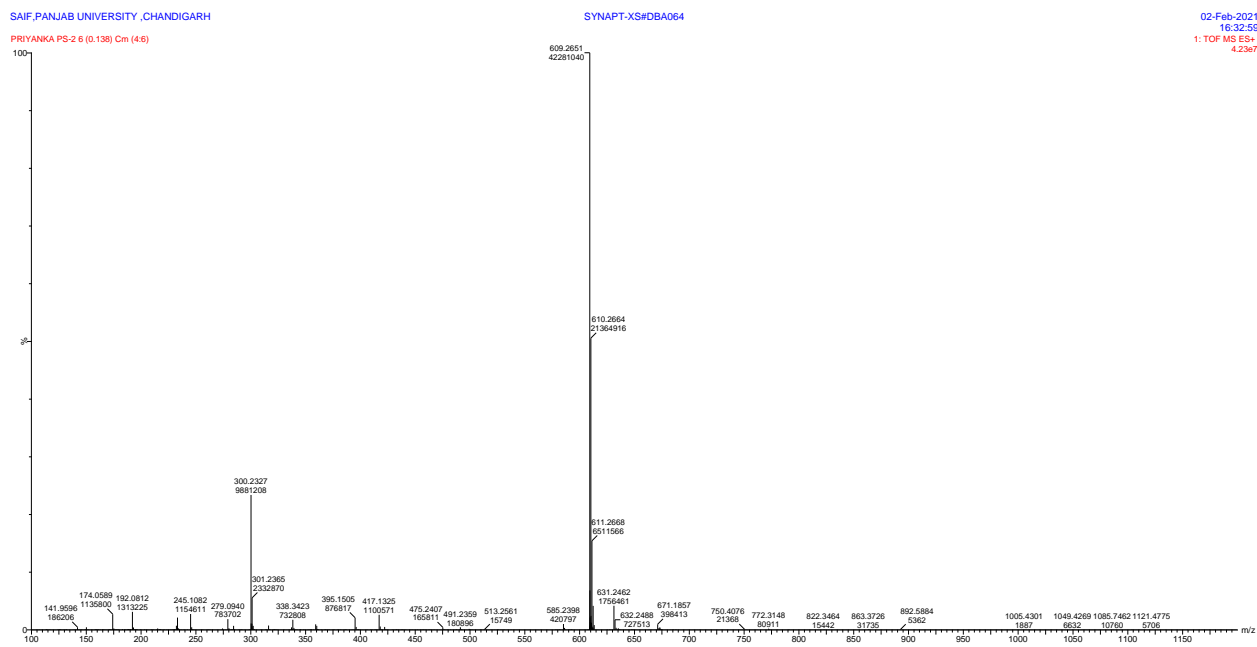

Mass spectrum of compound 6b (Fig.S18)

6c

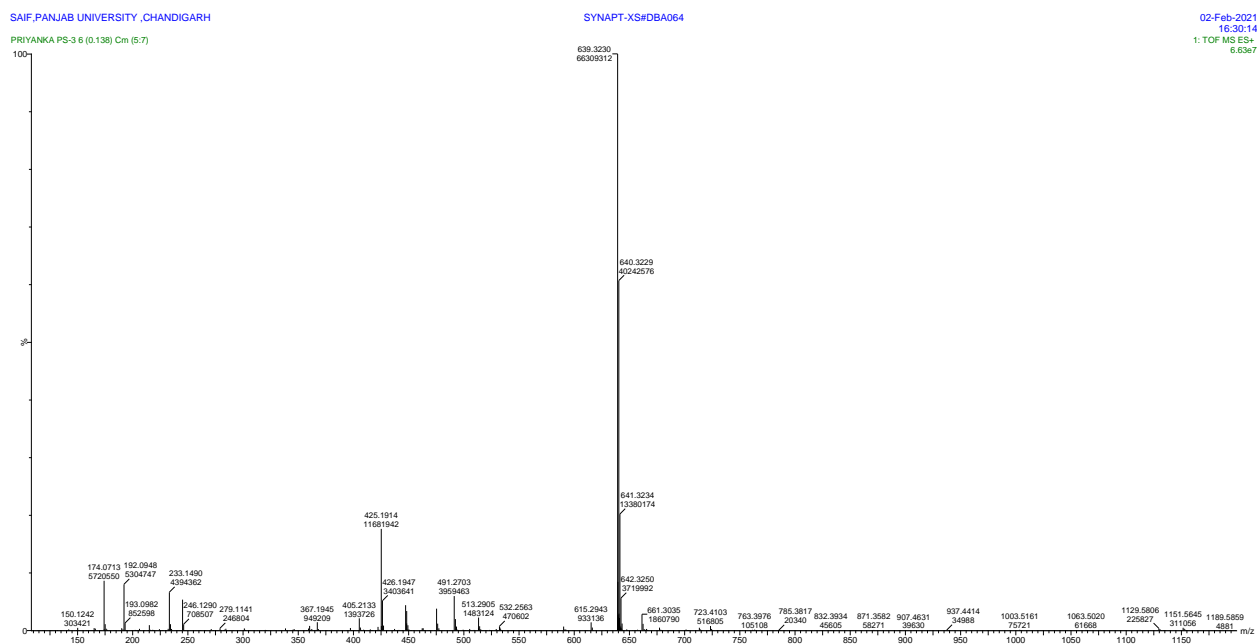

Mass spectrum of compound 6c (Fig.S19)

6d

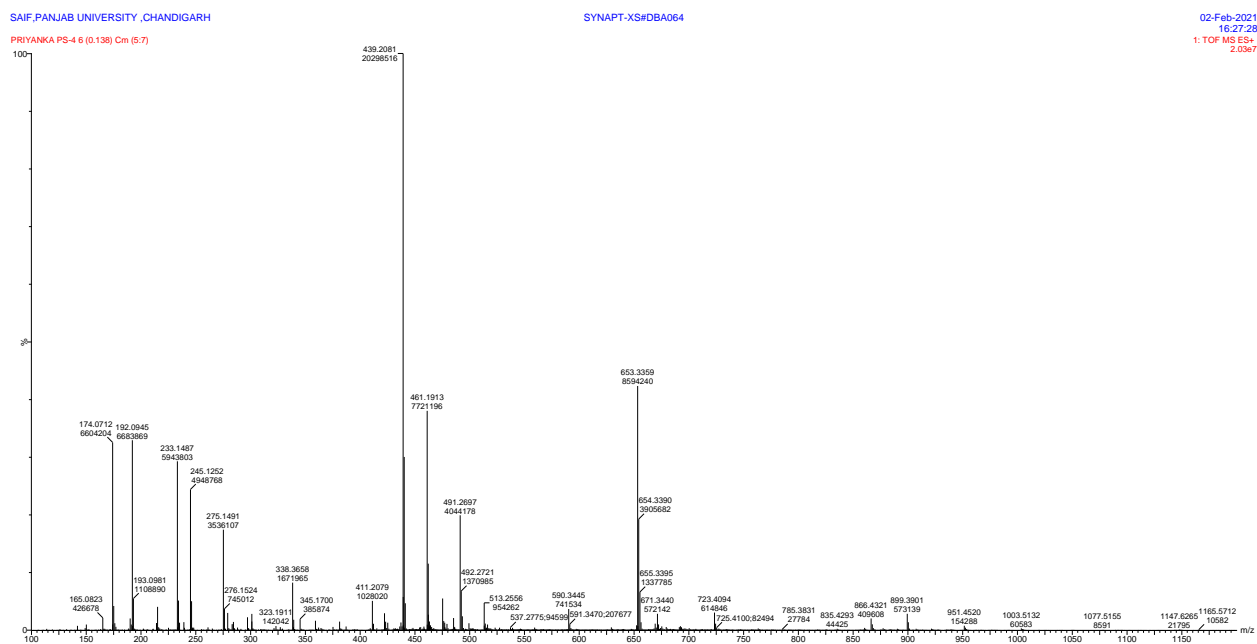

Mass spectrum of compound 6d (Fig.S20)

5a-Sn<sup>2+</sup>

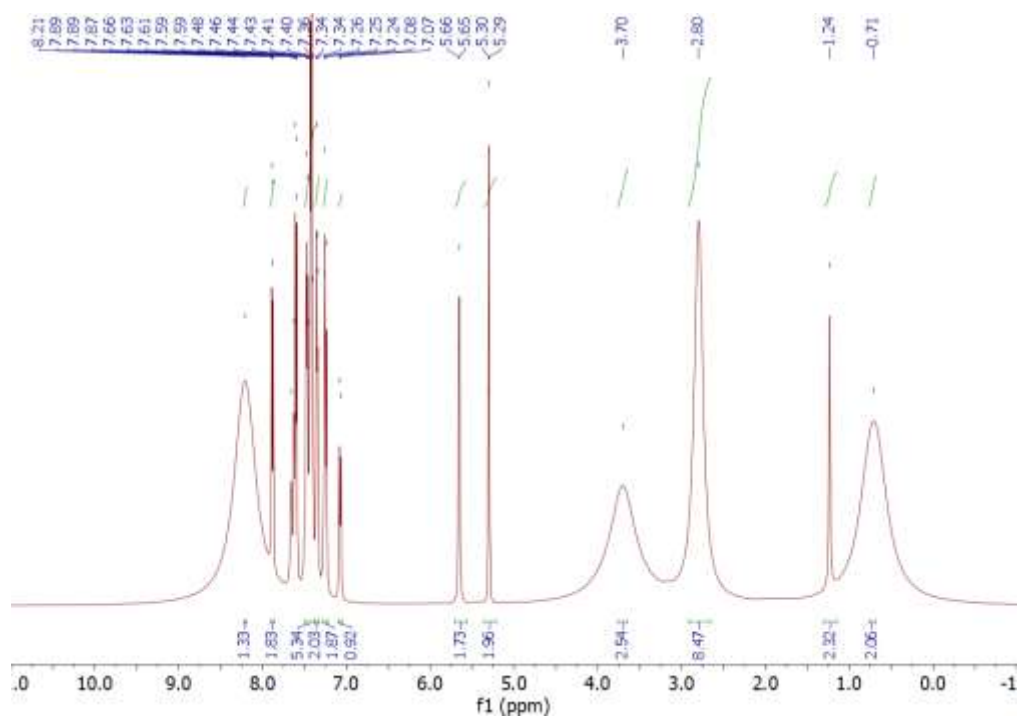

<sup>1</sup>H NMR spectrum of 5a-Sn<sup>2+</sup> complex (Fig.S21)

6a-Sn<sup>2+</sup>

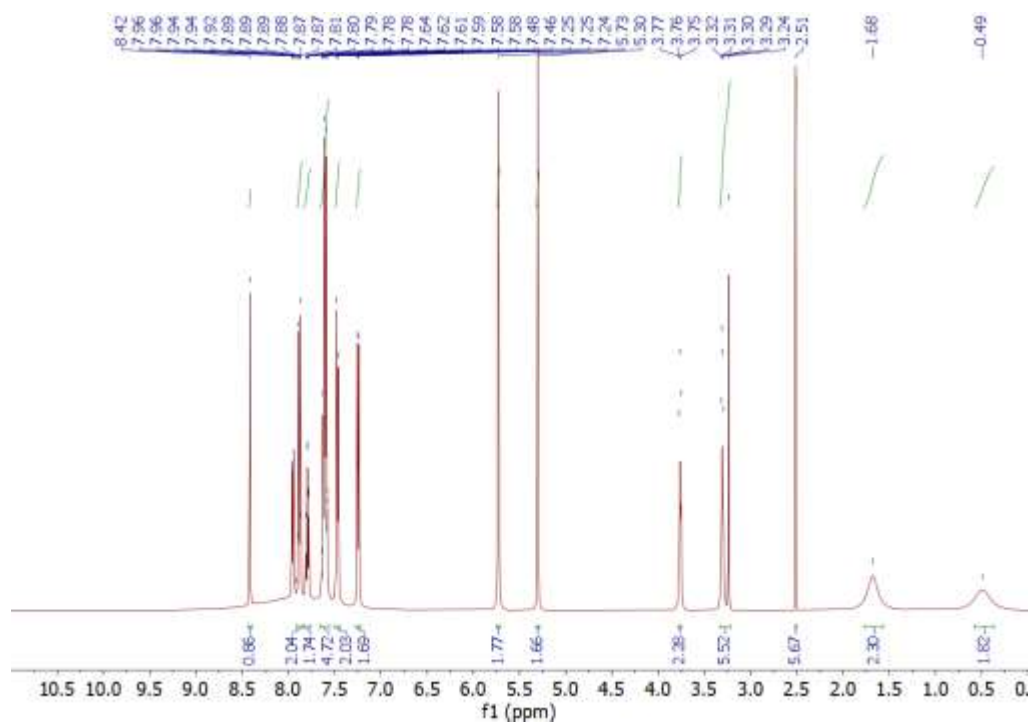

<sup>1</sup>H NMR spectrum of 6a-Sn<sup>2+</sup> complex (Fig.S22)
